# Supplementary material
Source: Research Square preprint supplement (doi:10.21203/rs.3.rs-9597683/v1)
Supplement: Supplementary file 1 [file cf7d3576f0e5a15f788bf3bf.docx]

Supporting information

**A Novel 1D Helical Coordination Polymer Based on Cu2+/L-Arginine-Schiff Base: Structure and Supramolecular Insights**

Dr. Syed meheboob Elahi*a

Department of Applied Science and Humanities

Bengal Institute of Technology and Management, Santiniketan

Dwaranda, BYPASS P.O, Sriniketan, West Bengal 731236

[meheboob.elahi@gmail.com](mailto:meheboob.elahi@gmail.com)

Orcid ID: 0000-0002-7418-2770


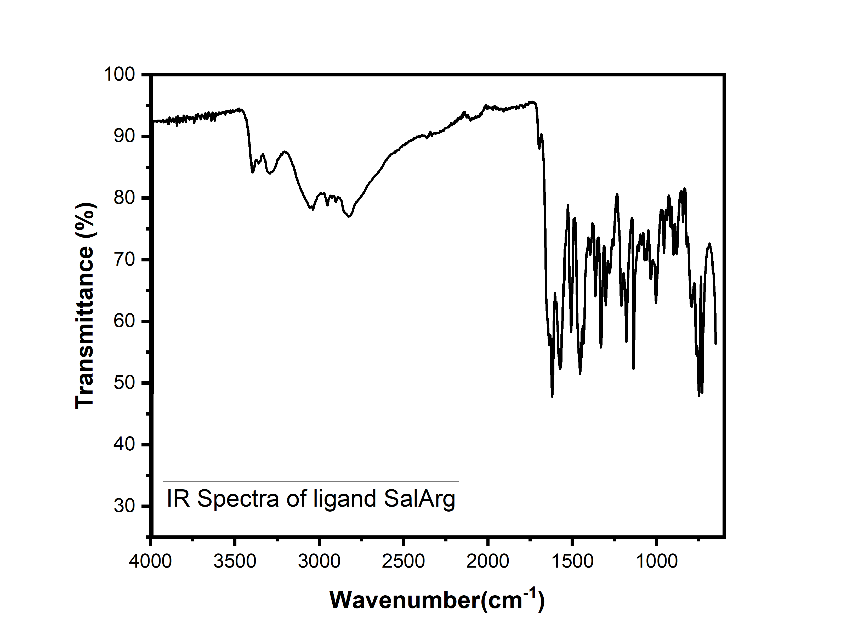


Figure S1. FT-IR spectra for ligand SalArgH2


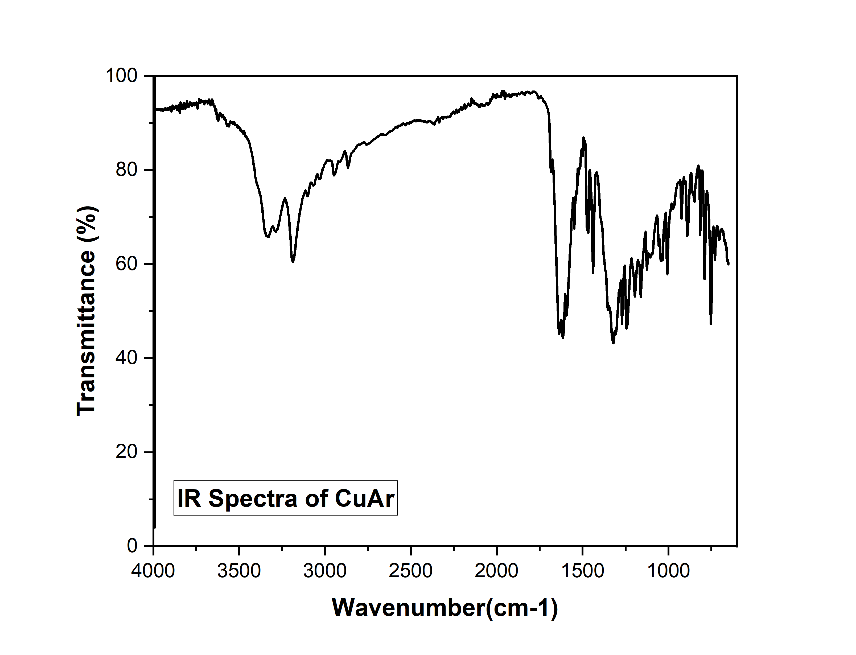


Figure S1. FT-IR spectra of 1D coordination polymer (CuAr)


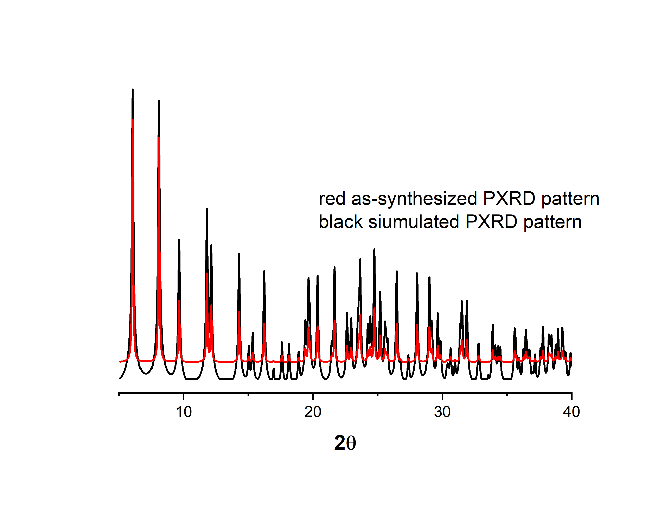


Figure S3. PXRD pattern match showing sample purity in the bulk phase.

| 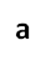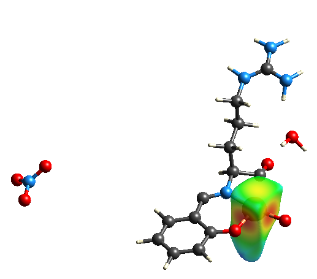 | 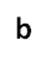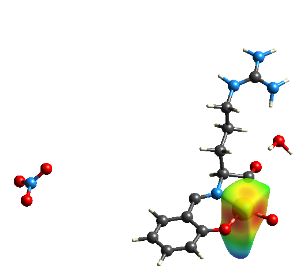 |
| --- | --- |
| 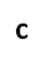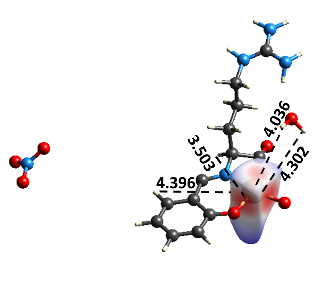 | 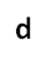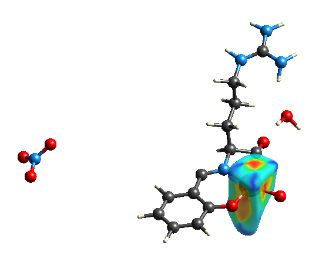 |
| Figure S4. Hirshfeld surface representations around Cu2+ ion (a) de (0.5909 to 2.7753) (b) di (0.5924 to 2.7753) (c) dnorm (-1.1930 to 1.4638) (d) shape index (-1.0000 to 1.0000) | |
